# Supplementary material
Source: publisher figshare collection journal article supplement (https://aacr.figshare.com/articles/dataset/_/22361359)
Supplement: Supplementary file 1 [file 39799609]

| REAGENT or RESOURCE                   | SOURCE                    | IDENTIFIER     | RRID       |
|---------------------------------------|---------------------------|----------------|------------|
| <b>Antibodies</b>                     |                           |                |            |
| Anti-USP48                            | abcam                     | Cat# ab72226   | AB_1271435 |
| Anti-GSDME                            | abcam                     | Cat# ab215191  | AB_2737000 |
| Anti-HGMB1                            | abcam                     | Cat# ab18256   | AB_444360  |
| Anti-caspase3                         | abcam                     | Cat# ab184787  | AB_2827742 |
| Anti-Flag                             | abcam                     | Cat# ab205606  | AB_2916341 |
| Anti-HA                               | abcam                     | Cat# ab9110    | AB_307019  |
| Anti-Myc                              | abcam                     | Cat# ab32      | AB_303599  |
| Anti-Ubiquitin                        | abcam                     | Cat# ab134953  | AB_2801561 |
| Anti-Ubiquitin (linkage-specific K48) | abcam                     | Cat# ab140601  | AB_2783797 |
| Anti-Ubiquitin (linkage-specific K63) | abcam                     | Cat# ab179434  | AB_2895239 |
| Anti-Tublin                           | Cell Signaling Technology | Cat# 2148      | AB_2288042 |
| Anti- $\beta$ -actin                  | Cell Signaling Technology | Cat# 3700      | AB_2242334 |
| Anti-VEGFA                            | abcam                     | Cat# ab52917   | AB_883427  |
| Anti-BRCA-1                           | abcam                     | Cat# ab213929  | AB_2893209 |
| Anti-GSDMD                            | abcam                     | Cat# ab219800  | AB_2888940 |
| Anti-p65                              | abcam                     | Cat# ab32536   | AB_776751  |
| Anti-SIRT6                            | Cell Signaling Technology | Cat# 12486     | AB_2636969 |
| Anti-Traf2                            | Cell Signaling Technology | Cat# 4724      | AB_2209845 |
| Anti-Dhx8                             | abcam                     | Cat# ab70588   | AB_1209451 |
| Anti-Cul4B                            | abcam                     | Cat# ab76470   | AB_2086689 |
| Anti-CD8a                             | Biologend                 | Cat# 155006    | AB_2750213 |
| Anti-CD3                              | Biologend                 | Cat# 100203    | AB_312660  |
| Anti-CD4                              | Biologend                 | Cat# 100427    | AB_493646  |
| Anti-CD25                             | Biologend                 | Cat# 102027    | AB_893290  |
| Anti-Foxp3                            | Biologend                 | Cat# 320007    | AB_492981  |
| Anti-DX5                              | Biologend                 | Cat# 108905    | AB_313412  |
| Anti-F4/80                            | Biologend                 | Cat# 157309    | AB_2876535 |
| Anti-CD11b                            | Biologend                 | Cat# 101225    | AB_830641  |
| Anti-NK1.1                            | Biologend                 | Cat# 156505    | AB_2876525 |
| Anti-Havcr2                           | ABclonal                  | Cat# A13443    | AB_2760304 |
| Anti-CK19                             | abcam                     | Cat# ab52625   | AB_2281020 |
| Anti-C1qa                             | Invitrogen                | Cat# PA5-29586 | AB_2852305 |
| Anti-TREM2                            | Invitrogen                | Cat# MA5-31267 | AB_2786908 |
| Anti-CD4                              | abcam                     | Cat# ab183685  | AB_2686917 |
| Anti-CD8a                             | abcam                     | Cat# ab209775  | AB_2860566 |
| Anti-FOXP3                            | abcam                     | Cat# ab215206  | AB_2860568 |
| <b>Cell Lines</b>                     |                           |                |            |
| Human 293T                            | ATCC                      | Cat# CRL-3216  | CVCL_0063  |

|             |      |               |           |
|-------------|------|---------------|-----------|
| Mouse L929  | ATCC | Cat# CCL-1    | CVCL_0462 |
| Mouse Pan02 | ATCC | Cat# CRL-2553 | CVCL_1633 |

### Chemicals

|                                 |                           |                  |     |
|---------------------------------|---------------------------|------------------|-----|
| Polybrene                       | Millipore                 | Cat# TR-1003-G   | N/A |
| RIPA buffer                     | Beyotime Biotechnology    | Cat# P0013E      | N/A |
| Puromycin                       | Sigma Aldrich             | Cat# P9620       | N/A |
| DAPI                            | Solarbio                  | Cat# C0065       | N/A |
| Cycloheximide (CHX)             | MCE                       | Cat# HY-12320    | N/A |
| MG-132                          | MCE                       | Cat# HY-13259    | N/A |
| protein G magnetic beads        | MCE                       | Cat# HY-K0204    | N/A |
| Triton X-100                    | Sigma Aldrich             | Cat# T8787       | N/A |
| DMEM                            | GIBCO                     | Cat# C11995500BT | N/A |
| Fetal Bovine Serum              | GIBCO                     | Cat# 10100       | N/A |
| Lipofectamine 2000              | Thermo Fisher Scientific  | Cat# 11668027    | N/A |
| Trizol                          | Invitrogen                | Cat# 15596026    | N/A |
| TB Green qPCR Master Mix        | TAKARA                    | Cat# RR430A      | N/A |
| PrimeScript™ RT reagent Kit     | TAKARA                    | Cat# RR037A      | N/A |
| anti-PD1                        | Master of Small Molecules | Cat# HY-101058   | N/A |
| Raptinal                        | Sigma Aldrich             | Cat# SML1745     | N/A |
| SYTOX™ Green Nucleic Acid Stain | Thermo Fisher Scientific  | Cat# S7020       | N/A |

### Critical Commercial Assays

|                                                    |                          |               |     |
|----------------------------------------------------|--------------------------|---------------|-----|
| CytoTox 96® Non-Radioactive Cytotoxicity Assay kit | Promega                  | Cat# G1780    | N/A |
| IL-18 ELISA kit purchased                          | Invitrogen               | Cat# BMS267-2 | N/A |
| IL-1 $\beta$ ELISA kit purchased                   | Invitrogen               | Cat# A35574   | N/A |
| Quick Coupled Transcription/Translation System     | Promega                  | Cat# L1171    | N/A |
| BCA protein assay kit                              | Thermo Fisher Scientific | Cat# 23225    | N/A |
| CRISPR Knockout Pooled Lentiviral sgRNA Libraries  | Dharmacon                | N/A           | N/A |
| siRNA Library                                      | Dharmacon                | N/A           | N/A |

### Mouse

|                                      |                      |     |     |
|--------------------------------------|----------------------|-----|-----|
| USP48 <sup>flox/flox</sup> mice      | Cyagen               | N/A | N/A |
| Alb-cre mice                         | Cyagen               | N/A | N/A |
| KRAS <sup>G12D</sup> ; PDX1-cre mice | Cyagen               | N/A | N/A |
| Mouse: C57BL/6                       | Shan Dong University | N/A | N/A |

### Biological Samples

|                   |                                            |     |     |
|-------------------|--------------------------------------------|-----|-----|
| Human HCC Tissue  | The Second Hospital of Shandong University | N/A | N/A |
| Human PDAC Tissue | The Second Hospital of                     | N/A | N/A |

Shandong University

**Software**

|             |          |                                                        |     |
|-------------|----------|--------------------------------------------------------|-----|
| FlowJo v9.3 | FlowJo   | <a href="http://www.flowjo.com">www.flowjo.com</a>     | N/A |
| Prism v6    | GraphPad | <a href="http://www.graphpad.com">www.graphpad.com</a> | N/A |
